# Supplementary material
Source: MDPI journal article supplement (https://www.mdpi.com/2673-7256/3/1/5)
Supplement: s1 [file s1]

*Supplementary material for*

**A Spectroscopic and DFT study of Alizarin Red S Complexes of Ga(III) in Semi-Aqueous Solution**

Licínia L.G. Justino,\* Sofia Braz and M. Luísa Ramos

*CQC-IMS, Department of Chemistry, University of Coimbra, Rua Larga 3004-535 Coimbra Portugal*

**Index:**

|                                                                                                                                                                                                                                     |   |
|-------------------------------------------------------------------------------------------------------------------------------------------------------------------------------------------------------------------------------------|---|
| <b>Fig. S1.</b> B3LYP/6-311++G(2d,2p) optimized geometries of additional tautomers of ARS.....                                                                                                                                      | 2 |
| <b>Fig. S2.</b> ATR-FTIR spectra (1800-400 cm <sup>-1</sup> ) of the solid powder samples obtained from the Ga(III):ARS 1:3, 1:2 and 1:1 molar ratio solutions.....                                                                 | 3 |
| <b>Fig. S3.</b> ATR-FTIR spectra (4000-400 cm <sup>-1</sup> ) of the solid powder samples obtained from the Ga(III):ARS 1:3, 1:2 and 1:1 molar ratio solutions.....                                                                 | 4 |
| <b>Fig. S4.</b> ATR-FTIR spectra (4400-400 cm <sup>-1</sup> ) of the solid powder samples of ARS and of the 1:3 Ga(III)/ARS sample compared with the B3LYP/6-311++G(d,p) calculated spectra for the same compounds.....             | 5 |
| <b>Fig. S5.</b> ATR-FTIR spectra (4400-400 cm <sup>-1</sup> ) calculated at the B3LYP/6-311++G(d,p) level of theory for the 1:3-fac-hc, the 1:2-anti-hc, the 1:1-hc and the 1:1-hh structures.....                                  | 6 |
| <b>Table S1.</b> Experimental (D <sub>2</sub> O/CD <sub>3</sub> OD, pH* 3,96) and calculated (B3LYP/GIAO/6-311++G(d,p) level in water) <sup>1</sup> H and <sup>13</sup> C NMR chemical shifts (δ/ ppm) for the free ligand ARS..... | 7 |

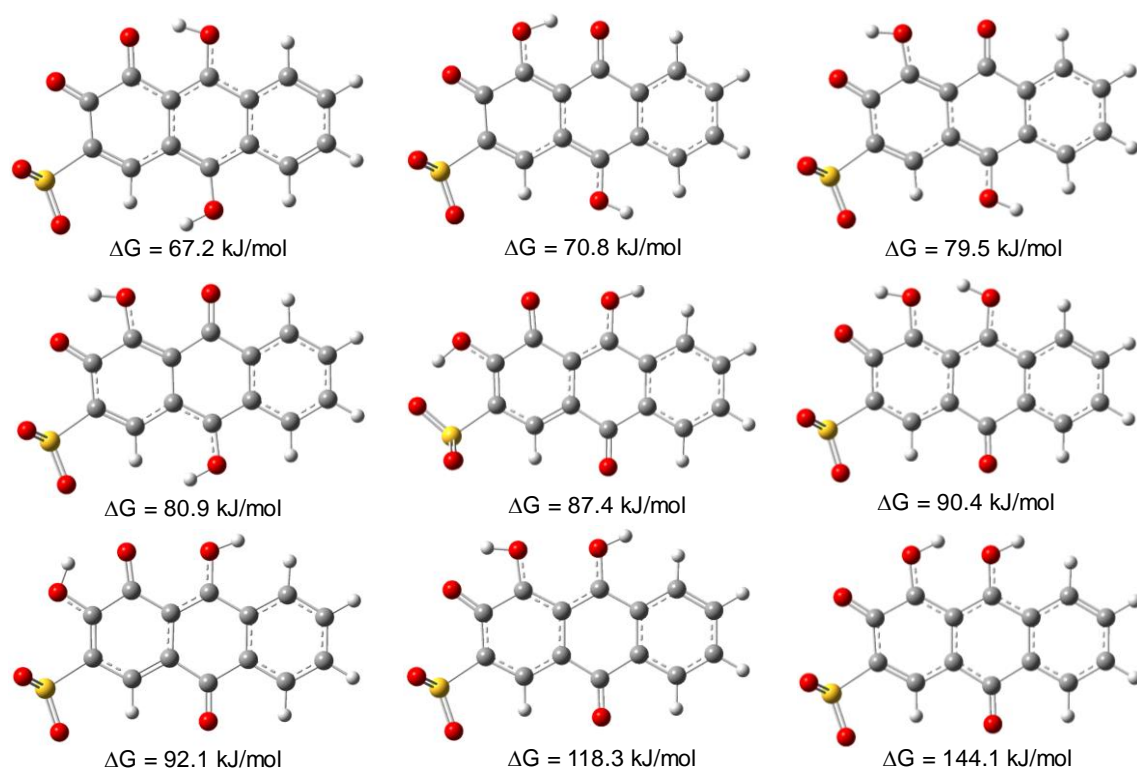

**Figure S1.** B3LYP/6-311++G(2d,2p) optimized geometries of additional tautomers of the monoanionic structure of ARS, considering the bulk effects of the solvent water (Gibbs energies are given relative to the lowest energy conformer **I**).

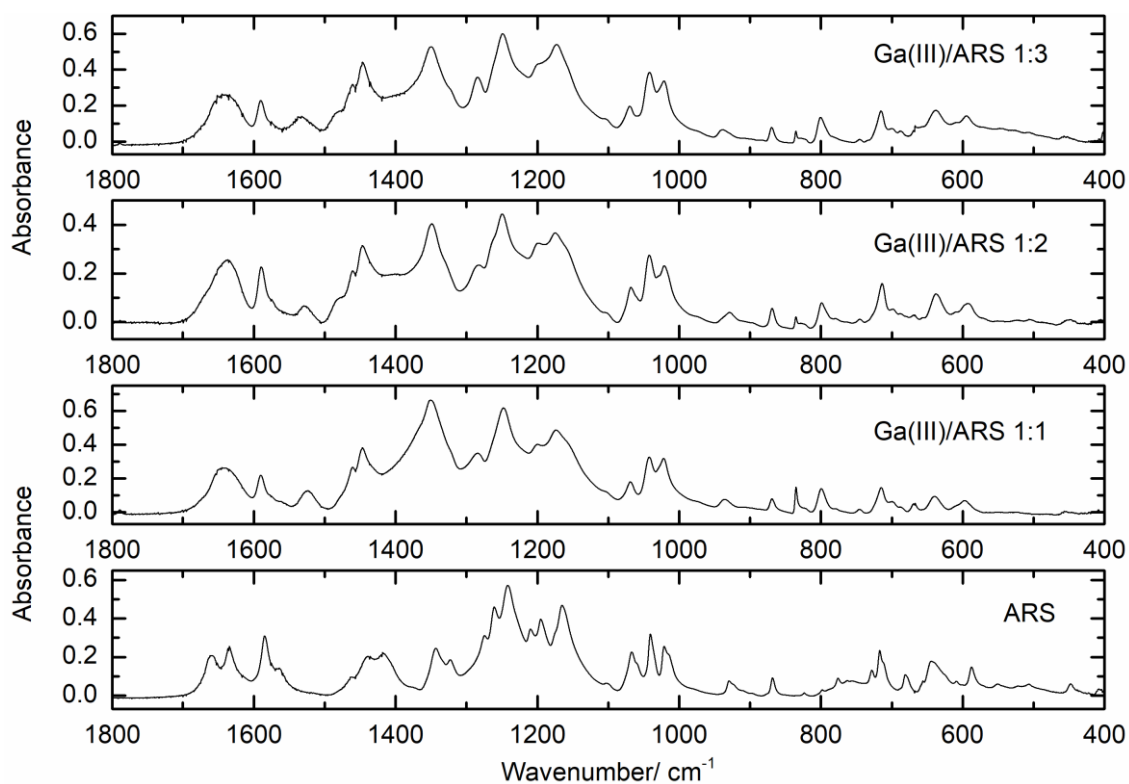

**Figure S2.** ATR-FTIR spectra ( $1800\text{--}400\text{ cm}^{-1}$ ) of the solid powder samples obtained from the Ga(III):ARS 1:3 (top), 1:2 (middle top) and 1:1 (middle bottom) molar ratio solutions at pH=4, compared with the solid ARS (bottom).

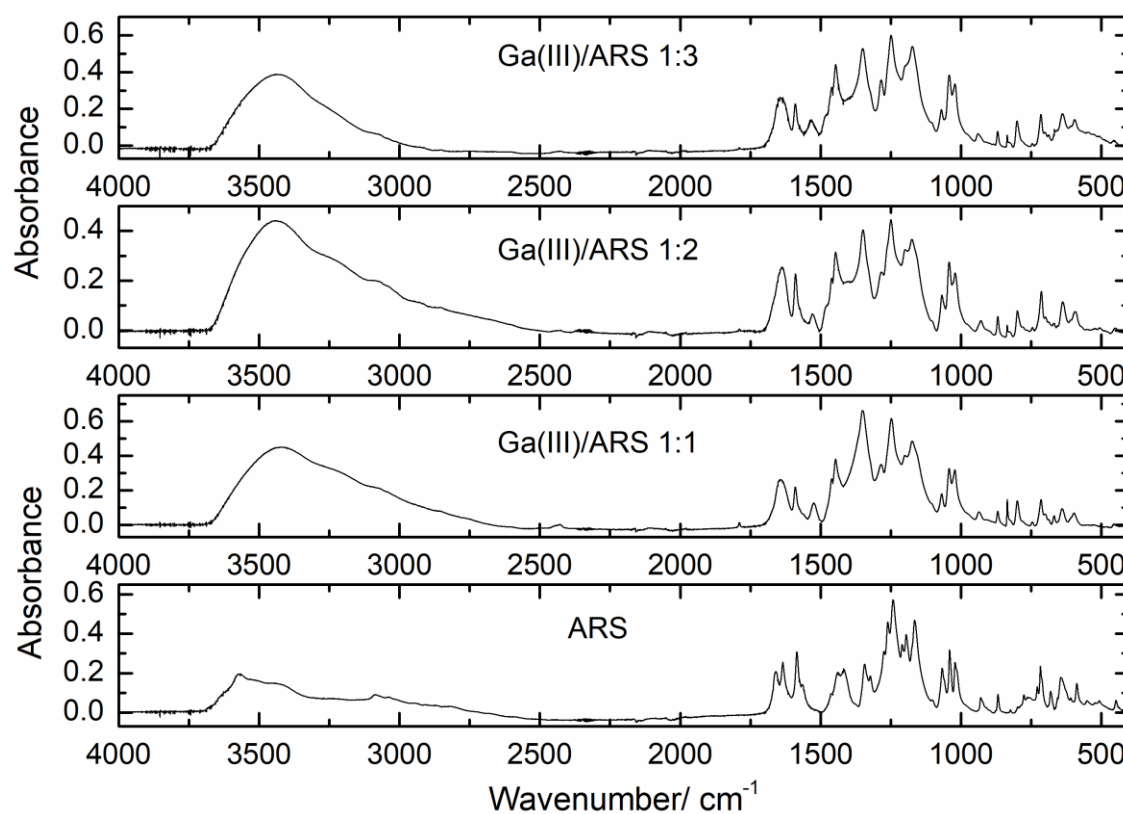

**Figure S3.** ATR-FTIR spectra of the solid powder samples obtained from the Ga(III):ARS 1:3 (top), 1:2 (middle top) and 1:1 (middle bottom) molar ratio solutions at pH=4, compared with the solid ARS (bottom).

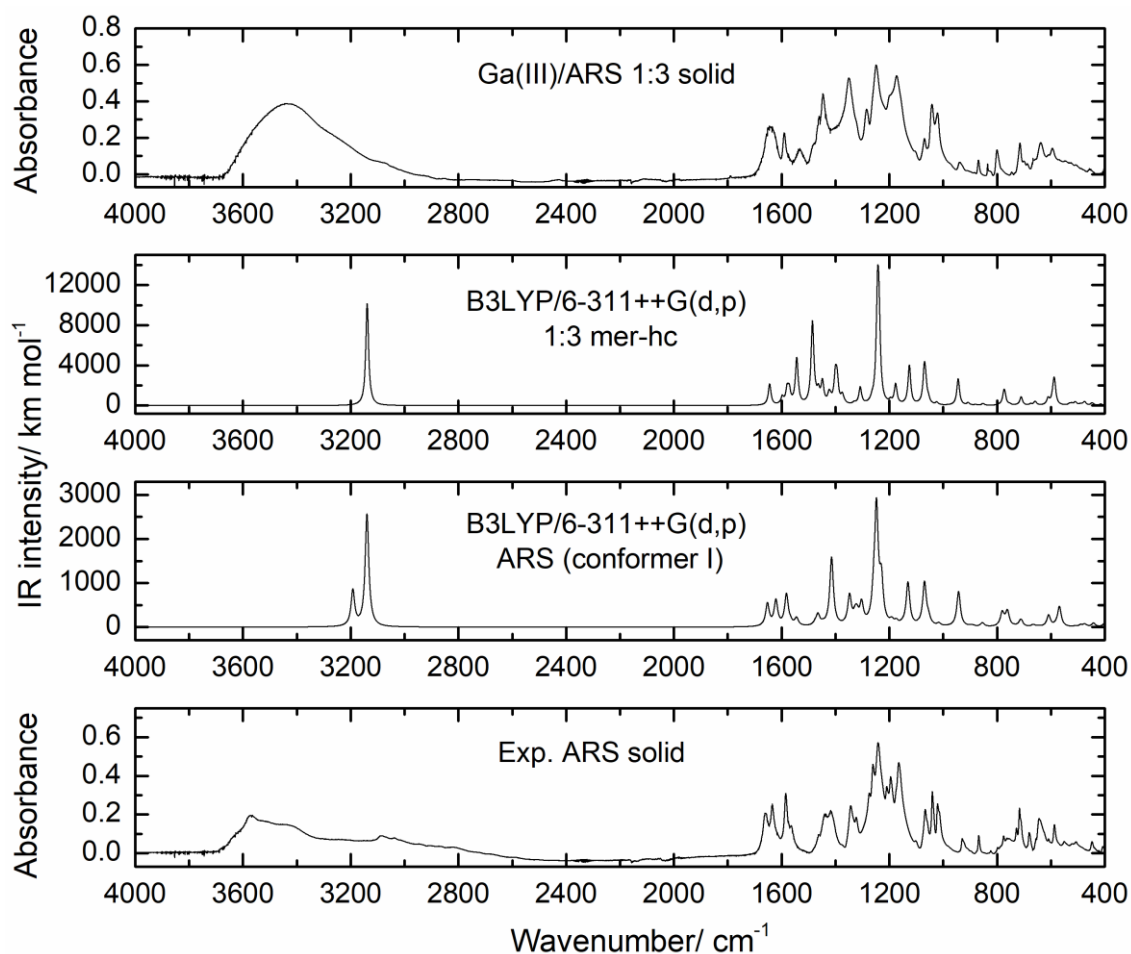

**Figure S4.** ATR-FTIR spectra ( $4400\text{--}400\text{ cm}^{-1}$ ) of the solid powder samples of ARS and of the 1:3 Ga(III)/ARS sample (bottom and top spectra, respectively), compared with the B3LYP/6-311++G(d,p) calculated spectra for conformer **I** of ARS (middle bottom) and for the 1:3 *mer* structure (middle top). The calculated spectra were simulated using Lorentzian functions with a full-width-at-half-maximum (FWHM) of  $6\text{ cm}^{-1}$ , centred at the scaled calculated frequencies.

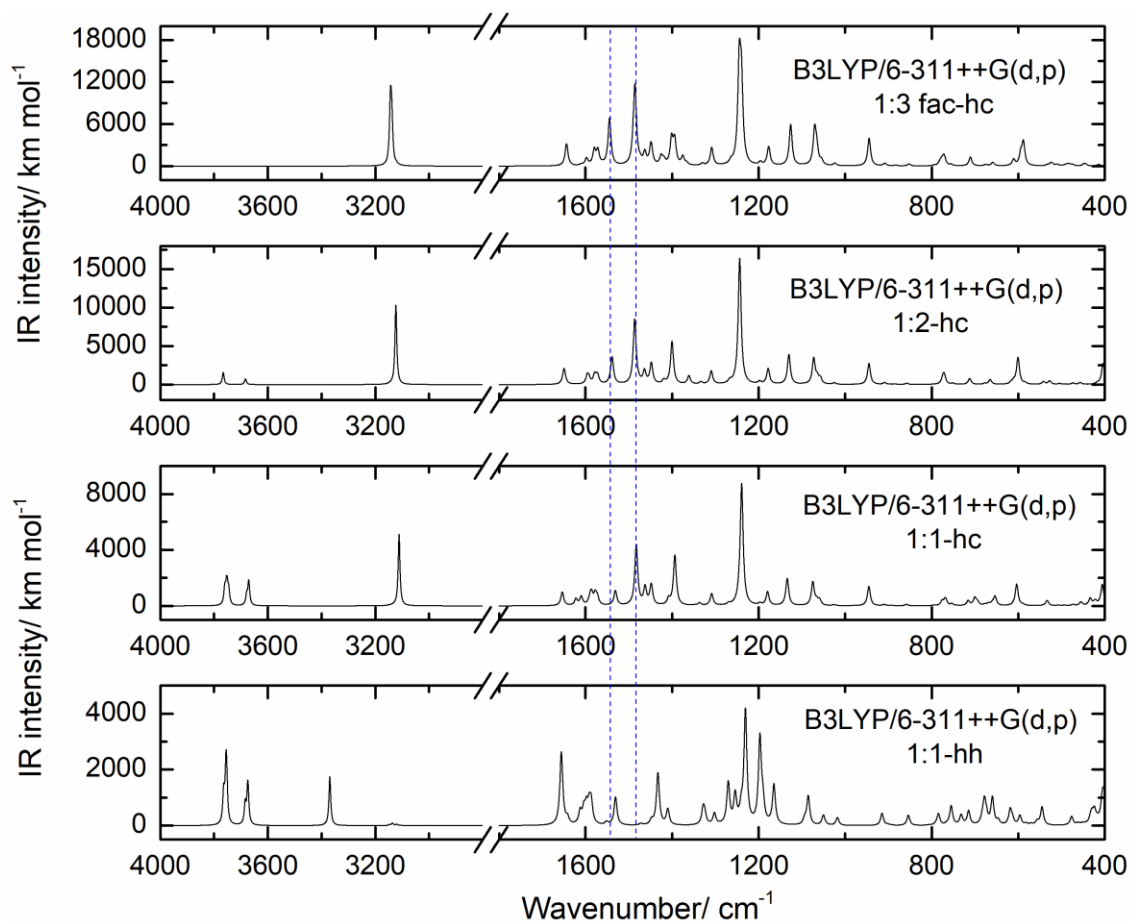

**Figure S5.** ATR-FTIR spectra (4400-400 cm<sup>-1</sup>) calculated at the B3LYP/6-311++G(d,p) level of theory for the 1:3-fac-hc (top), the 1:2-anti-hc (middle top), the 1:1-hc (middle bottom) and the 1:1-hh (bottom) structures. The calculated spectra were simulated using Lorentzian functions with a full-width-at-half-maximum (FWHM) of 6 cm<sup>-1</sup>, centred at the scaled calculated frequencies.

**Table S1.**  $^1\text{H}$  and  $^{13}\text{C}$  NMR chemical shifts ( $\delta$  / ppm) for the free ligand ARS (experimental data in  $\text{D}_2\text{O}/\text{CD}_3\text{OD}$ , pH\* 3,96 and calculated at the B3LYP/GIAO/6-311++G(d,p) level in water; the numbering is in accordance with Scheme 1).

|                | $\delta ^1\text{H RMN (exp.)}^a$ | $\delta ^1\text{H RMN (calc.)}^a$ |                 | $\delta ^{13}\text{C RMN (exp.)}$ | $\delta ^{13}\text{C RMN (calc.)}$ |
|----------------|----------------------------------|-----------------------------------|-----------------|-----------------------------------|------------------------------------|
| H <sub>1</sub> | $\text{--}^b$                    | $\text{--}^c$                     | C <sub>10</sub> | 190,21                            | $\text{--}^c$                      |
| H <sub>2</sub> | $\text{--}^b$                    | $\text{--}^c$                     | C <sub>9</sub>  | 183,66                            | $\text{--}^c$                      |
| H <sub>8</sub> | 8,15                             | 8,72                              | C <sub>1</sub>  | 152,58                            | 162,38                             |
| H <sub>5</sub> | 8,08                             | 8,69                              | C <sub>2</sub>  | 150,82                            | 158,30                             |
| H <sub>4</sub> | 7,98                             | 8,28                              | C <sub>3</sub>  | 134,86                            | 145,18                             |
| H <sub>7</sub> | 7,82                             | 8,10                              | C <sub>6</sub>  | 136,94                            | 143,18                             |
| H <sub>6</sub> | 7,82                             | 8,09                              | C <sub>7</sub>  | 136,16                            | 142,29                             |
|                |                                  |                                   | C <sub>11</sub> | 134,51                            | 140,34                             |
|                |                                  |                                   | C <sub>12</sub> | 134,33                            | 140,23                             |
|                |                                  |                                   | C <sub>8</sub>  | 128,54                            | 134,69                             |
|                |                                  |                                   | C <sub>5</sub>  | 128,31                            | 134,59                             |
|                |                                  |                                   | C <sub>14</sub> | 124,81                            | 129,25                             |
|                |                                  |                                   | C <sub>4</sub>  | 120,71                            | 126,73                             |
|                |                                  |                                   | C <sub>13</sub> | 118,46                            | 122,69                             |

<sup>a</sup> The numbering is based on the carbon atom to which the H atom is attached. <sup>b</sup> Not observed in this solvent (observed in DMSO at 11.47 and 12.64, respectively for H<sub>1</sub> and H<sub>2</sub>). <sup>c</sup> The calculation for the isolated molecule does not give a realistic prediction of the  $^1\text{H}$  NMR shifts of the OH protons nor of the  $^{13}\text{C}$  shifts of the carbonyl groups, since these groups are strongly affected by hydrogen bonding established with the solvents and with neighbouring molecules.
