# Supplementary material
Source: MDPI journal article supplement (https://www.mdpi.com/2673-7256/3/1/5)
Supplement: s1 [file s1]

Archive with 1 entries (1 files):
- photochem-2133227-supplementary.pdf
